# Supplementary material for: The screening of Alzheimer’s patients with CSF biomarkers, modulates the distribution of APOE genotype: impact on clinical trials
Source: Springer Nature journal article supplement (doi:10.1007/s00415-014-7335-6), 2014-04-11
Supplement: MOESM1 [file 415_2014_7335_MOESM1_ESM.doc]

**Supplemental Table 1.** Characteristics of non-AD patients.

| **Cognitive disorders** | **N = 188** |
| --- | --- |
| Subjective memory complaint | 28 |
| Depression / psychiatric disorders | 25 |
| Alcohol dementia | 25 |
| Frontotemporal dementia | 15 |
| Vascular dementia | 12 |
| Non neurological controls | 10 |
| Lewy Body dementia | 8 |
| Other degenerative dementia a | 32 |
| Other non degenerative dementia b | 33 |
|  |  |
| aCorticobasal degeneration, Parkinson's disease, progressive supranuclear palsy, | |
| focal atrophy, Huntington disease, motor neuron disease. | |
| b toxic related dementia, normal pressure hydrocephalus, infectious diseases, | |
| vitamin deficiency. | |

**Supplemental Table 2.** Characteristics of AD and non-AD patients according to *APOE* genotype.

|  | **AD patients** | | |  | **Non AD patients** | | |
| --- | --- | --- | --- | --- | --- | --- | --- |
| **Characteristics** | **Non E4** | **E4** | **P-value** |  | **Non E4** | **E4** | **P-value** |
| N (%) | 94 (45.0) | 115 (55.0) |  |  | 98 (76.6) | 30 (23.4) |  |
| Age, years, mean (SD) | 72.7 (10.1) | 71.8 (7.8) | 0.49 |  | 63.2 (11.4) | 66.5 (9.7) | 0.15 |
| Women, n (%) | 55 (58.5) | 68 (59.1) | 0.93 |  | 50 (51.0) | 10 (33.3) | 0.09 |
| High education level, n (%) a | 31 (36.9) | 30 (30.3) | 0.35 |  | 27 (35.1) | 9 (33.3) | 0.87 |
| MMSE, years, mean (SD) | 21.3 (5.5) | 20.2 (6.2) | 0.18 |  | 24.4 (4.2) | 23.2 (4.9) | 0.20 |
| Duration of AD, years, mean (SD) | 2.8 (1.7) | 2.6 (1.8) | 0.75 |  | — | — |  |
|  |  |  |  |  |  |  |  |
| CSF biomarkers, pg/mL, mean (SD) |  |  |  |  |  |  |  |
| Aβ 1-42 | 554.3 (273.9) | 433.9 (142.2) | <0.001 |  | 871.3 (260.8) | 770.5 (270.6) | 0.07 |
| Total Tau | 610.7 (300.4) | 574.3 (288.5) | 0.37 |  | 224.8 (130.8) | 240.8 (107.2) | 0.54 |
| p-Tau 181 | 99.4 (53.1) | 92.0 (35.9) | 0.23 |  | 44.7 (14.5) | 47.7 (10.8) | 0.35 |
| a Baccalaureate degree and higher. | | | | | | | |

**Supplemental Table 3.** AUC and optimal thresholds of CSF biomarkers according to *APOE* E4 status.

|  | **AUC (SE)** | **Threshold, pg/mL** | **Sensitivity** | **Specificity** |
| --- | --- | --- | --- | --- |
| **Aβ 1-42** |  |  |  |  |
| AD vs non-AD | 0.83 (0.02) | 568 | 0.81 | 0.78 |
| AD non E4 vs non-AD | 0.76 (0.03) | 515 | 0.87 | 0.61 |
| AD E4 vs non-AD | 0.89 (0.02) | 568 | 0.81 | 0.89 |
|  |  |  |  |  |
| **Total Tau** |  |  |  |  |
| AD vs non-AD | 0.92 (0.01) | 307 | 0.88 | 0.89 |
| AD non E4 vs non-AD | 0.93 (0.02) | 307 | 0.93 | 0.89 |
| AD E4 vs non-AD | 0.92 (0.02) | 321 | 0.87 | 0.89 |
|  |  |  |  |  |
| **p-Tau 181** |  |  |  |  |
| AD vs non-AD | 0.93 (0.01) | 65 | 0.81 | 0.91 |
| AD non E4 vs non-AD | 0.94 (0.01) | 65 | 0.86 | 0.91 |
| AD E4 vs non-AD | 0.92 (0.02) | 61 | 0.87 | 0.86 |

**Supplemental Table 4.** CSF Tau levels according to *APOE* genotype.

|  | Total Tau, pg/mL | | | |
| --- | --- | --- | --- | --- |
| *APOE* genotype | Mean (SD) | CV, %a | Unadjusted | Adjusted b |
| AD patients |  |  |  |  |
| E2/E2, E2/E3 | 593.5 (343.4) | 57.8 | 0.85 | 0.96 |
| E3/E3 | 612.7 (297.1) | 48.5 | Ref. | Ref. |
| E2/E4, E3/E4 | 581.5 (295.0) | 50.7 | 0.49 | 0.48 |
| E4/E4 | 549.5 (268.9) | 48.9 | 0.34 | 0.29 |
|  |  |  |  |  |
| Non-AD patients |  |  |  |  |
| E2/E2, E2/E3 | 223.5 (134.8) | 60.3 | 0.81 | 0.94 |
| E3/E3 | 232.2 (108.2) | 46.6 | Ref. | Ref. |
| E2/E4, E3/E4, E4/E4 | 240.8 (107.2) | 44.5 | 0.52 | 0.48 |
| a Coefficient of variation = SD / mean. | | | | |
| b Adjusted on age, sex, MMSE score, education level, and duration of AD. | | | | |

**Supplemental Table 5**. Repartition of *APOE* genotype in AD patients, according to CSF biomarkers cut-offs.The use of more stringent cut-offs of CSF Aβ1-42 leads to progressively increase the proportion of ε4/ ε4 AD patients in the selected sample

|  | AD patients |  | E2/E2 |  | E2/E4 |  |  |  |
| --- | --- | --- | --- | --- | --- | --- | --- | --- |
| Characteristics | N |  | E2/E3 | E3/E3 | E3/E4 | E4/E4 | Z-statistic | P-value |
| Overall, n (%) | 209 |  | 10 (4.8) | 84 (40.2) | 89 (42.6) | 26 (12.4) | Ref. | . |
|  |  |  |  |  |  |  |  |  |
| Aβ 1-42 cut-offs, pg/mL, n (%) |  |  |  |  |  |  |  |  |
| <600 | 168 |  | 6 (3.6) | 58 (34.5) | 79 (47.0) | 25 (14.9) | -0.69 | 0.49 |
| <500 | 145 |  | 5 (3.5) | 50 (34.5) | 66 (45.5) | 24 (16.6) | -1.09 | 0.28 |
| <450 | 110 |  | 2 (1.8) | 41 (37.3) | 46 (41.8) | 21 (19.1) | -1.59 | 0.11 |
| <400 | 84 |  | 2 (2.4) | 31 (36.9) | 32 (38.1) | 19 (22.6) | -2.19 | 0.03 |
| <350 | 54 |  | 0 | 21 (28.9) | 19 (35.2) | 14 (25.9) | -2.46 | 0.01 |
|  |  |  |  |  |  |  |  |  |
| Total Tau cut-offs, pg/mL, n (%) |  |  |  |  |  |  |  |  |
| >250 | 196 |  | 9 (4.6) | 80 (40.8) | 83 (42.3) | 24 (12.2) | 0.06 | 0.95 |
| >300 | 187 |  | 9 (4.8) | 78 (41.7) | 77 (41.2) | 22 (13.3) | 0.21 | 0.83 |
| >350 | 167 |  | 6 (3.7) | 72 (43.1) | 69 (41.3) | 20 (12.0) | 0.14 | 0.89 |
| >400 | 147 |  | 6 (4.1) | 62 (42.2) | 62 (42.2) | 17 (11.6) | 0.25 | 0.80 |
| >450 | 123 |  | 6 (4.9) | 51 (41.5) | 51 (41.5) | 15 (12.2) | 0.07 | 0.94 |

**Supplemental Table 6.** Diagnosis among non-AD patients with isolated low CSF Aβ levels.

| Diagnosis, n (%) | Non-AD patients with isolated low Aβ levels (N=32) |
| --- | --- |
| Vascular dementia | 6 (19) |
| Lewy Body dementia | 5 (16) |
| Frontotemporal dementia | 4 (13) |
| Depression / psychiatric disorders | 4 (13) |
| Normal pressure hydrocephalus | 3 (9) |
| Parkinson with dementia | 2 (6) |
| Alcohol dementia | 2 (6) |
| sleep apnea syndrome | 2 (6) |
| HIV | 2 (6) |
| Non neurological controls | 2 (6) |

**Supplemental Table 7.** Discriminatory power of CSF biomarkers to distinguish AD patients from those with or without another neurodegenerative disease.

| CSF biomarkers, pg/mL | AUC (SE) | Cut-off, pg/mL | Sensitivity | Specificity |
| --- | --- | --- | --- | --- |
|  |  |  |  |  |
| **AD (N=244) vs non-AD / neurodegenerative diseases (N=67)** | | | | |
| Aβ 1-42 | 0.73 (0.04) | 606 | 0.81 | 0.63 |
| Total Tau | 0.89 (0.03) | 288 | 0.9 | 0.83 |
| p-Tau 181 | 0.92 (0.03) | 61 | 0.86 | 0.93 |
|  |  |  |  |  |
| **AD (N=244) vs non-AD / non-neurodegenerative diseases (N=121)** | | | | |
| Aβ 1-42 | 0.86 (0.02) | 543 | 0.75 | 0.89 |
| Total Tau | 0.93 (0.01) | 307 | 0.88 | 0.9 |
| p-Tau 181 | 0.93 (0.01) | 65 | 0.81 | 0.91 |

**Supplemental Figure 1. Part A. ROC curves.** CSF Tau to discriminate between non-AD patients and AD with ε4 allele (black curve), AD without ε4 allele (grey curve), and all AD patients (long-dashed curve). Analysis are detailed in supplementary Table 3.

**Part B.** **Distribution of CSF Tau** **levels in AD and non-AD patients, according to *APOE* genotype.** Box plots represent mean (diamond), median, 25th, 75th percentiles, extreme values. Horizontal long-dashed line is the optimal cut-off for CSF Tau (307 pg/mL) based on previous ROC curve analyse in the overall population study.
